# Supplementary material for: Synthesis and biological evaluation of cytostatin analoguesElectronic supplementary information (ESI) available: experimental details. See http://www.rsc.org/suppdata/cc/b3/b305308n/
Source: Royal Society of Chemistry journal article supplement (doi:10.1039/b305308n), 2003-01-01
Supplement: b305308n.doc [file b305308n.doc]

Monotriethylammoniumsalt of {1-{(1S,2S,5S)-1-methyl-5-[(2S,3S)-3-methyl-6-oxo-3,6-dihydro-2H-pyran-2-yl]-2-phosphonooxy-hexyl}-prop-2-ynyl}ethanoate (9)

Amorphous white powder; *Rf* = 0 (ethyl acetate); **=** +118 (c = 0.10, methanol);1H NMR (400 MHz, d4-methanol) 7.16 (dd, *J* = 9.6, 6.5 Hz, 1 H), 5.93 (d, *J* = 9.6, 0.6 Hz,1 H), 5.28 (dd,*J* = 8.2, 2.2 Hz, 1 H), 4.31 (dddd,*J* = 10.6, 7.0, 5.5, 3.7 Hz, 1 H), 4.11 (dd, *J* = 10.2, 2.9 Hz, 1 H), 3.20 (q, *J* = 7.2 Hz, 6 H), 2.88 (d,*J* = 2.2 Hz, 1 H), 2.59 (dquint,*J* = 7.0, 3.1 Hz, 1 H), 2.10-2.17 (m, 1 H), 2.07 (s, 3 H), 1.95-2.03 (m, 1 H), 1.78-1.93 (m, 2 H), 1.63 (ddt,*J* = 16.8, 4.3, 7.2 Hz, 1 H), 1.31 (t,*J* = 7.2 Hz, 9 H), 1.24-1.33 (m), 1.13 (d, *J* = 7.0 Hz, 3 H), 1.01 (d, *J* = 7.0 Hz, 3 H), 0.97 (d, *J* = 6.8 Hz, 3 H); 13C NMR (100 MHz, d4-methanol) 171.7, 167.3, 155.0, 120.0, 85.6, 81.8, 76.0 (d, *J*(13C,31P) = 6.2 Hz), 75.9, 66.6, 47.7, 41.4 (d,*J*(13C,31P) = 6.2 Hz), 35.5, 31.6, 30.9, 28.9, 21.0, 14.8, 11.0, 10.3, 9.2; 31P NMR (162 MHz, d4-methanol) 1.33; HRMS (FAB, 3-NBA) calcd for C46H48NaO8P [M+Na+]: 425.1341, found 425.1328.

(Triethylammonium)-hydrogen-{(1S,2S,3R,4Z)-3-hydroxy-5-iodo-2-methyl-1-{(3S)-3-[(2S,3S)-3-methyl-6-oxo-3,6-dihydro-2H-pyran-2-yl]-butyl}-pent-4-ynyl} phosphate (12)

Amorphous white powder; *Rf* = 0 (ethyl acetate); **=** +52.6 (c = 0.175, methanol);1H NMR (400 MHz, d4-methanol) 7.16 (dd, *J* = 9.6, 6.6 Hz, 1 H), 5.93 (dd, *J* = 9.6, 0.6 Hz, 1 H), 4.44 (d,*J* = 9.6 Hz, 1 H), 4.37-4.46 (m, 1 H), 4.11 (dd, *J* = 10.2, 2.9 Hz, 1 H), 3.20 (q, *J* = 7.4 Hz, 6 H), 2.54-2.63 (m, 1 H), 1.90-2.00 (m, 1 H), 1.73-1.88 (m, 3 H), 1.47-1.57 (m, 1 H), 1.32 (t,*J* = 7.2 Hz, 9 H), 1.24-1.34 (m, 1 H), 1.01 (d, *J* = 6.8 Hz, 3 H), 1.00 (d, *J* = 6.8 Hz, 3 H), 0.96 (d, *J* = 6.8 Hz, 3 H); 13C NMR (100 MHz, d4-methanol) 167.4, 155.1, 120.0, 95.9, 85.6, 74.9 (d, *J*(13C,31P) = 6.2 Hz), 65.0, 47.8, 45.2 (d,*J*(13C,31P) = 4.6 Hz), 35.4, 31.6, 31.5, 29.4, 14.9, 11.0, 9.7, 9.2, 4.5; 31P NMR (162 MHz, d4-methanol) 2.87; HRMS (FAB, 3-NBA) calcd for C16H24NaIO7P [M+Na+]: 509.0202, found 509.0211.

(Triethylammonium)-hydrogen-{(1S,2S,3R,4Z)-3-hydroxy-5-iodo-2-methyl-1-{(3S)-3-[(2S,3S)-3-methyl-6-oxo-3,6-dihydro-2H-pyran-2-yl]-butyl}-pent-4-enyl} phosphate (14)

Amorphous white powder; *Rf* = 0 (ethyl acetate); **=** +76.0 (c = 0.175, MeOH).;1H NMR (400 MHz, d4-methanol) 7.16 (dd, *J* = 9.6, 6.5 Hz, 1 H), 6.51 (dd,*J* = 7.7, 0.8 Hz, 1 H), 6.25 (dd,*J* = 8.4, 7.7 Hz, 1 H), 5.93 (dd, *J* = 9.6, 0.8 Hz, 1 H), 4.49 (dddd,*J* = 10.4, 8.2, 5.9, 2.2 Hz, 1 H), 4.37 (t,*J* = 9.2 Hz, 1 H), 4.10 (dd, *J* = 10.2, 2.9 Hz, 1 H), 3.20 (q, *J* = 7.2 Hz, 6 H), 2.54-2.62 (m, 1 H), 1.94-2.05 (m, 1 H), 1.67-1.87 (m, 3 H), 1.53 (ddt,*J* = 17.2, 4.5, 8.2 Hz, 1 H), 1.32 (t,*J* = 7.2 Hz, 9 H), 1.24-1.34 (m, 1 H), 1.01 (d, *J* = 7.0 Hz, 3 H), 0.97 (d, *J* = 6.8 Hz, 3 H), 0.91 (d, *J* = 6.8 Hz, 3 H); 13C NMR (100 MHz, d4-methanol) 167.4, 155.0, 143.9, 120.0, 85.5, 83.7, 75.8, 75.2 (d, *J*(13C,31P) = 5.4 Hz), 47.8, 43.3 (d,*J*(13C,31P) = 4.6 Hz), 35.4, 31.6, 31.6 (*J*(13C,31P) = 3.1 Hz), 29.4, 14.9, 10.9, 9.2, 9.1; 31P NMR (162 MHz, d4-methanol) 3.05; HRMS (FAB, 3-NBA) calcd for C16H26INaO7P [M+Na+]: 511.0359, found 511.0351.

**Enzymatic assays: PP2A1-inhibition**

The enzyme (0.025 U) was pre-incubated with the inhibitors in a buffer(61) (pH 8.1, 100 l total assay volume) containing Tris*****HCl (40 mM), KCl (20 mM), MgCl2*****6H2O (30 mM), DTT (2 mM) and BSA (0.1 %) for 10 min at room temperature. Then p-NPP was added (end concentration 5 mM) and the read-out (405 nm) was recorded on a microplate-reader after 10-15 min incubation at room temperature. The IC50 values reported in Table 1 were calculated on the basis of at least three determinations.

**Enzymatic assays: PP1-inhibition**

The enzyme (0.025 U) was pre-incubated with the inhibitors in a buffer(61) (pH 8.1, 100 l total assay volume) containing Tris.HCl (40 mM), KCl (20 mM), MgCl2.6H2O (30 mM) and DTT (2 mM) and BSA (0.1 %) for 10 min at room temperature. Then p-NPP was added (end concentration 5 mM) and the read-out (405 nm) was recorded on a microplate-reader after 10-15 min incubation at room temperature.

**VHR-inhibition**

The enzyme (0.001 U) was pre-incubated with the inhibitors in a buffer(66) (pH 6.5, 100 l total assay volume) containing MOPS (25 mM), EDTA (5 mM), NaCl (125 mM), DTT (2 mM) and BSA (0.1 %) for 10 min at room temperature. Then p-NPP was added (end concentration 5 mM) and the read-out (405 nm) was recorded on a microplate-reader after 1 h incubation at 37 °C.

**PTP1B-inhibition**

The enzyme (0.001 U) was pre-incubated with the inhibitors in a buffer(66) (pH 6.5, 100 l total assay volume) containing MOPS (25 mM), EDTA (5 mM), NaCl (125 mM), DTT (2 mM) and BSA (0.1 %) for 10 min at room temperature. Then p-NPP was added (end concentration 5 mM) and the read-out (405 nm) was recorded on a microplate-reader after 10-15 min incubation at room temperature.

**CD45-inhibition**

The assay was performed using the commercially available BIOMOL GREENTM CD45 Tyrosine Phosphatase Assay Kit. The enzyme (0.001 U) was pre-incubated with the inhibitors in a buffer

The enzyme (75 U) was incubated with the inhibitors in a buffer (pH 7.2, 45 l total assay volume) containing HEPES (50 mM), EDTA (1 mM), DTT (1 mM), 0.05 % NP-40 and pp60c-src peptide (M=1543.7) (0.177 mM end concentration) as substrate for 1 h at 30 °C. Then 100 l BIOMOL GREENTM reagent was added and the read-out (690 nm) was recorded on a microplate-reader.

(1) a) A. Takai, G. Mieskies, *Biochem. J.* **1991**, *275*, 233; b) X. Huang, M. R. Swingle, R. E. Honkanen, in *Methods in Enzymology, Vol. 315*, (Ed.: K. Palczewski), Academic Press, San Diego, p. 589.

(2) a) A. Takai, G. Mieskies, *Biochem. J.* **1991**, *275*, 233; b) X. Huang, M. R. Swingle, R. E. Honkanen, in *Methods in Enzymology, Vol. 315*, (Ed.: K. Palczewski), Academic Press, San Diego, p. 589.

(3) T. Hamaguchi, A. Masuda, T. Morino, H. Osada, *Chem. Biol.* **1997**, *4*, 279.

(4) T. Hamaguchi, A. Masuda, T. Morino, H. Osada, *Chem. Biol.* **1997**, *4*, 279.
